# Supplementary material
Source: publisher figshare collection journal article supplement (https://acs.figshare.com/ndownloader/files/3817699)
Supplement: Supplementary file 1 [file 3817699]

**Supporting Information**

**Stealth Surface Modification of Surface-Enhanced Raman  
Scattering Substrates for Sensitive and Accurate Detection in  
Protein Solutions**

*Fang Sun, Jean-Rene Ella-Menye, Daniel David Galvan, Tao Bai, Hsiang-Chieh Hung, Ying-Nien Chou, Peng Zhang, Shaoyi Jiang, and Qiuming Yu\**

Department of Chemical Engineering, University of Washington, Seattle, WA 98195, USA

**Table S1. SERS Vibrational Frequencies for 4-MPBA and CBT**

| 4-MPBA                   |                                                 | CBT                      |                                         |
|--------------------------|-------------------------------------------------|--------------------------|-----------------------------------------|
| SERS (cm <sup>-1</sup> ) | Assignments <sup>a</sup>                        | SERS (cm <sup>-1</sup> ) | Assignments <sup>a</sup>                |
| 420                      | 7a; $\beta_{\text{CCC}} + \nu_{\text{CS}}$      | 455                      | $\gamma_{\text{NC}}$                    |
| 473                      | 16b; $\gamma_{\text{CCC}} + \beta_{\text{OBO}}$ | 520                      | Si                                      |
| 614                      | 6b; $\beta_{\text{CCC}} + \beta_{\text{OBO}}$   | 672                      | $\nu_{\text{CS}}$                       |
| 694                      | 6a; $\beta_{\text{CCC}} + \nu_{\text{CS}}$      | 756                      | $\nu_{\text{C4N}}^+$                    |
| 728                      | 4b; $\gamma_{\text{CCC}}$                       | 847                      | $\beta_{\text{CSAu}}$                   |
| 754                      | 11; $\gamma_{\text{CH}}$                        | 891                      | $\nu_{\text{CCOO}^-} + \nu_{\text{CC}}$ |
| 1000                     | 12; $\beta_{\text{CCC}}$                        | 935                      | $\beta_{\text{HCH}}$                    |
| 1024                     | 18a; $\beta_{\text{CH}}$                        | 1079                     | $\nu_{\text{C4N}}^+$                    |
| 1065                     | $\nu_{\text{CS}}$                               | 1132                     | $\beta_{\text{CH3}}$                    |
| 1075                     | 1; $\beta_{\text{CCC}}$                         | 1246                     | $\gamma_{\text{CH2}}$                   |
| 1187                     | 9a; $\beta_{\text{CH}} + \beta_{\text{BOH}}$    | 1365                     | $\nu_{\text{COO}^-}$                    |
| 1283                     | 3; $\beta_{\text{CH}} + \beta_{\text{BOH}}$     | 1448                     | $\gamma_{\text{CH3}}$                   |
| 1472 <sup>b</sup>        | 19b; $\nu_{\text{CC}}$                          | 1585                     | $\nu_{\text{COO}^-}$                    |
| 1487                     | 19a; $\nu_{\text{CC}}$                          |                          |                                         |
| 1574 <sup>b</sup>        | 8b; $\nu_{\text{CC}}$                           |                          |                                         |
| 1587                     | 8a; $\nu_{\text{CC}}$                           |                          |                                         |

<sup>a</sup>  $\nu$ ; stretching,  $\beta$ ; in plane bending,  $\gamma$ ; out of plane bending

<sup>b</sup> 8b and 19b non-totally symmetric ring-stretching vibrational modes increase while 8a and 19a totally symmetric ring-stretching vibrational modes decrease in SERS spectra of 4-MPBA after fructose binding due to Herzberg-Teller contributions.

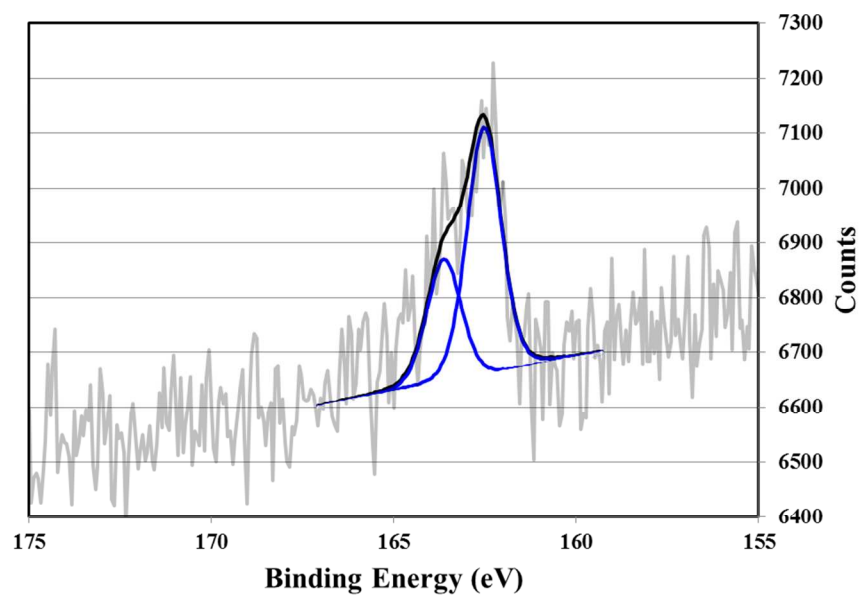

**Figure S1.** High-resolution XPS spectra of the S 2p region of pure CBT SAM. The peaks were fit using S  $2p_{3/2}$  and  $2p_{1/2}$  with a 2:1 area ratio and a splitting of 1.2 eV. Only the binding energy of S  $2p_{3/2}$  at 162.0 eV for the surface bounded sulfur was obtained, indicating that a good CBT SAM was formed.
